# Supplementary material for: In‐Hospital Outcomes After Transcatheter Versus Surgical Aortic Valve Replacement in Octogenarians
Source: PubMed Central journal article supplement — J Am Heart Assoc. 2019 Jan 19;8(2):e011206. doi: 10.1161/JAHA.118.011206 (PMC6497334; doi:10.1161/jaha.118.011206), 2019-01-19
Supplement: JAH3-8-e011206-s001.pdf [file JAH3-8-e011206-s001.pdf]

# **SUPPLEMENTAL MATERIAL**

**Table S1. International Classification of Diseases, 9<sup>th</sup> revision, clinical modification (ICD9-CM)  
diagnostic and procedural codes used to identify complications.**

| <b>Condition</b>                           | <b>ICD-9 CM<br/>diagnosis codes</b>                                                                                                          | <b>ICD-9-CM<br/>procedure codes</b>                          |
|--------------------------------------------|----------------------------------------------------------------------------------------------------------------------------------------------|--------------------------------------------------------------|
| <b>Permanent pacemaker implantation</b>    |                                                                                                                                              | 00.50, 37.8 – 37.83                                          |
| <b>Acute kidney injury</b>                 | 584 – 584.9                                                                                                                                  |                                                              |
| <b>Transient ischemic attack or stroke</b> | 344.6 – 344.61, 431, 433.01,<br>433.11, 433.21, 433.31, 433.81,<br>433.91, 434.01, 434.11, 434.91,<br>435 – 435.9, 997.02                    |                                                              |
| <b>Cardiogenic shock</b>                   | 785.51                                                                                                                                       |                                                              |
| <b>Cardiac arrest</b>                      | 427.5                                                                                                                                        |                                                              |
| <b>Bleeding</b>                            | 430, 431, 432 – 432.9                                                                                                                        |                                                              |
| <b>Blood transfusion</b>                   |                                                                                                                                              | 99.00 – 99.09                                                |
| <b>Vascular complications</b>              | 441.0 – 441.03, 441.1, 441.3,<br>441.5, 441.6, 414.1 – 414.19,<br>443.22, 444 – 444.9, 447.0,<br>868.04, 900 – 904.9, 997.7,<br>998.2, 999.2 | 39.31, 39.41, 39.49,<br>39.52, 39.56, 39.57,<br>39.59, 39.79 |

**Table S2. Demographics and characteristics of patients excluded from the standardized morbidity ratio (SMR) weighted analyses. TAVR patients excluded represent individuals ‘always treated’ with TAVR, and SAVR patients excluded represent individuals ‘never treated’ with TAVR.**

|                                                   | <b>TAVR<br/>n=4,050</b> | <b>SAVR<br/>n=2,175</b> |
|---------------------------------------------------|-------------------------|-------------------------|
| <b>Year, n (%)</b>                                |                         |                         |
| 2012                                              | 305 (8)                 | 805 (37)                |
| 2013                                              | 685 (17)                | 730 (34)                |
| 2014                                              | 1,265 (31)              | 425 (20)                |
| 2015*                                             | 1,795 (44)              | 215 (10)                |
| <b>Age, years, median (IQR)</b>                   | 86 (83 – 88)            | 81 (80 – 83)            |
| <b>Male, n (%)</b>                                | 2,095 (52)              | 1,225 (56)              |
| <b>Race/ethnicity, n (%)</b>                      |                         |                         |
| Non-Hispanic White                                | 2,565 (90)              | 1,200 (89)              |
| Non-Hispanic Black                                | 105 (4)                 | 15 (1)                  |
| Hispanic                                          | 80 (3)                  | 65 (5)                  |
| Other                                             | 90 (3)                  | 65 (5)                  |
| <b>CCI, median (IQR)</b>                          | 2.9 (1.4 – 4.0)         | 0.1 (0 – 1.3)           |
| <b>Primary insurance, n (%)</b>                   |                         |                         |
| Medicare/Medicaid                                 | 3,820 (95)              | 280 (94)                |
| Private                                           | 135 (3)                 | 95 (4)                  |
| Other/self-pay                                    | 65 (2)                  | 45 (2)                  |
| <b>Median household income<sup>†</sup>, n (%)</b> |                         |                         |
| Low                                               | 940 (22)                | 280 (14)                |
| Medium                                            | 1,170 (31)              | 460 (23)                |
| High                                              | 810 (22)                | 620 (31)                |
| Highest                                           | 920 (25)                | 620 (31)                |
| <b>Hospital region, n (%)</b>                     |                         |                         |
| Northeast                                         | 550 (14)                | 540 (25)                |
| Midwest                                           | 1,430 (35)              | 975 (45)                |
| South                                             | 1,365 (34)              | 295 (14)                |
| West                                              | 705 (17)                | 365 (17)                |
| <b>Hospital location, n (%)</b>                   |                         |                         |
| Rural, non-teaching                               | 303 (1)                 | 30 (1)                  |
| Urban, non-teaching                               | 385 (10)                | 405 (19)                |
| Urban, teaching                                   | 3,635 (90)              | 1,740 (80)              |
| <b>Hospital size<sup>‡</sup>, n (%)</b>           |                         |                         |
| Small                                             | 240 (5)                 | 105 (5)                 |
| Medium                                            | 645 (16)                | 295 (14)                |
| Large                                             | 3,165 (78)              | 1,775 (82)              |

TAVR, transcatheter aortic valve replacement; SAVR, surgical aortic valve replacement; IQR, interquartile range; CCI, Charlson Comorbidity index

\*Only includes patients admitted between January 1, 2015 and September 30, 2015

---

<sup>†</sup>Median household income for each patient's ZIP code was characterized into quartiles within each ZIP code

<sup>‡</sup>Hospital size is based on the number of hospital beds; cut points were chosen for each region and location combination so that approximately  $\frac{1}{3}$  of hospitals would appear in each category

**Table S3. Demographics and characteristics of patients included in the standardized morbidity ratio (SMR) weighted analyses.**

|                                                   | TAVR                   |                       | SAVR                         |  |
|---------------------------------------------------|------------------------|-----------------------|------------------------------|--|
|                                                   | Unweighted<br>n=15,095 | Unweighted<br>n=7,640 | SMR<br>Weighted*<br>n=15,303 |  |
| <b>Year, n (%)</b>                                |                        |                       |                              |  |
| 2012                                              | 1,965 (13)             | 1,620 (21)            | 2,335 (15)                   |  |
| 2013                                              | 3,585 (24)             | 2,270 (30)            | 3,759 (25)                   |  |
| 2014                                              | 4,870 (32)             | 2,095 (27)            | 4,955 (32)                   |  |
| 2015 <sup>†</sup>                                 | 4,675 (31)             | 1,655 (22)            | 4,253 (28)                   |  |
| <b>Age, years, median (IQR)</b>                   | 84 (82 – 86)           | 82 (81 – 85)          | 84 (82 – 86)                 |  |
| <b>Male, n (%)</b>                                | 8,025 (53)             | 4,195 (55)            | 8,085 (53)                   |  |
| <b>Race/ethnicity, n (%)</b>                      |                        |                       |                              |  |
| Non-Hispanic White                                | 13,555 (90)            | 6,775 (89)            | 13,852 (91)                  |  |
| Non-Hispanic Black                                | 415 (3)                | 200 (3)               | 274 (2)                      |  |
| Hispanic                                          | 540 (4)                | 330 (4)               | 536 (4)                      |  |
| Other                                             | 585 (4)                | 335 (4)               | 641 (4)                      |  |
| <b>CCI, median (IQR)</b>                          | 1.8 (0.7 – 2.9)        | 0.9 (0.1 – 2.0)       | 1.9 (0.8 – 3.0)              |  |
| <b>Primary insurance, n (%)</b>                   |                        |                       |                              |  |
| Medicare/Medicaid                                 | 14,290 (95)            | 7,210 (94)            | 14,458 (94)                  |  |
| Private                                           | 620 (4)                | 335 (4)               | 663 (4)                      |  |
| Other/self-pay                                    | 185 (1)                | 95 (1)                | 182 (1)                      |  |
| <b>Median household income<sup>‡</sup>, n (%)</b> |                        |                       |                              |  |
| Low                                               | 3,045 (20)             | 1,415 (19)            | 3,253 (21)                   |  |
| Medium                                            | 3,595 (24)             | 1,700 (22)            | 3,919 (26)                   |  |
| High                                              | 4,010 (27)             | 2,045 (27)            | 3,921 (26)                   |  |
| Highest                                           | 4,445 (29)             | 2,480 (32)            | 4,210 (28)                   |  |
| <b>Hospital region, n (%)</b>                     |                        |                       |                              |  |
| Northeast                                         | 4,070 (27)             | 2,290 (30)            | 3,864 (25)                   |  |
| Midwest                                           | 3,125 (21)             | 1,595 (21)            | 2,892 (19)                   |  |
| South                                             | 4,925 (33)             | 2,195 (29)            | 5,382 (35)                   |  |
| West                                              | 2,975 (20)             | 1,560 (20)            | 3,164 (21)                   |  |
| <b>Hospital location, n (%)</b>                   |                        |                       |                              |  |
| Rural, non-teaching                               | 130 (1)                | 90 (1)                | 177 (1)                      |  |
| Urban, non-teaching                               | 1,545 (10)             | 865 (11)              | 1,369 (9)                    |  |
| Urban, teaching                                   | 13,420 (89)            | 6,685 (88)            | 13,757 (90)                  |  |
| <b>Hospital size<sup>§</sup>, n (%)</b>           |                        |                       |                              |  |
| Small                                             | 785 (5)                | 370 (5)               | 784 (5)                      |  |
| Medium                                            | 2,875 (19)             | 1,370 (18)            | 2,688 (18)                   |  |
| Large                                             | 11,435 (76)            | 5,900 (77)            | 11,831 (77)                  |  |

TAVR, transcatheter aortic valve replacement; SAVR, surgical aortic valve replacement; IQR, interquartile range; CCI, Charlson comorbidity index

\*Standardized morbidity ratio (SMR) weighted, using admit year, sex, age, race/ethnicity, the individual components for the Charlson comorbidity index (CCI), primary insurance type, income,

---

hospital region, hospital type, and hospital size; both age and CCI were modeled as restricted cubic splines

<sup>†</sup>Only includes patients admitted between January 1, 2015 and September 30, 2015

<sup>‡</sup>Median household income for each patient's ZIP code was characterized into quartiles within each ZIP code, per year

<sup>§</sup>Hospital size is based on the number of hospital beds; cut points were chosen for each region and location combination so that approximately  $\frac{1}{3}$  of hospitals would appear in each category
